# Supplementary material for: Cerebral Tuberculosis in an Active- Duty Military Officer That Led to Tinnitus From a TB Brain Abscess; Case Report
Source: Research Square preprint supplement (doi:10.21203/rs.3.rs-1043869/v1), 2022-03-08
Supplement: Supplementary file 1 [file aa4db13872b3a0a0889c5e91.docx]

| Brain CT-Scan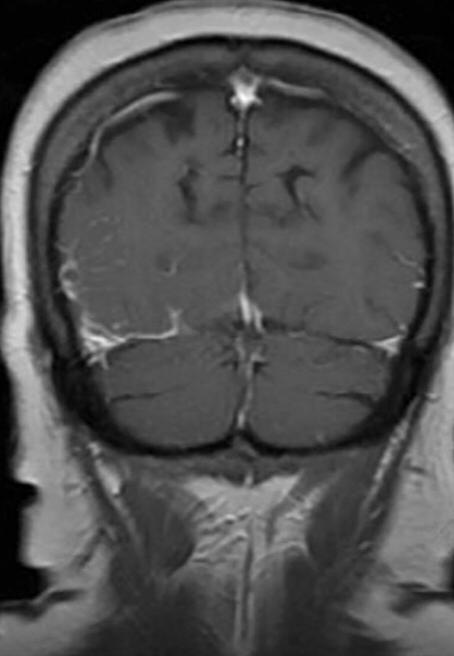 | - Right parieto-temporal and left parietal subcortical hypodensities with finger-like borders with no contrast re-uptake |  |
| --- | --- | --- |
| Brain MRI  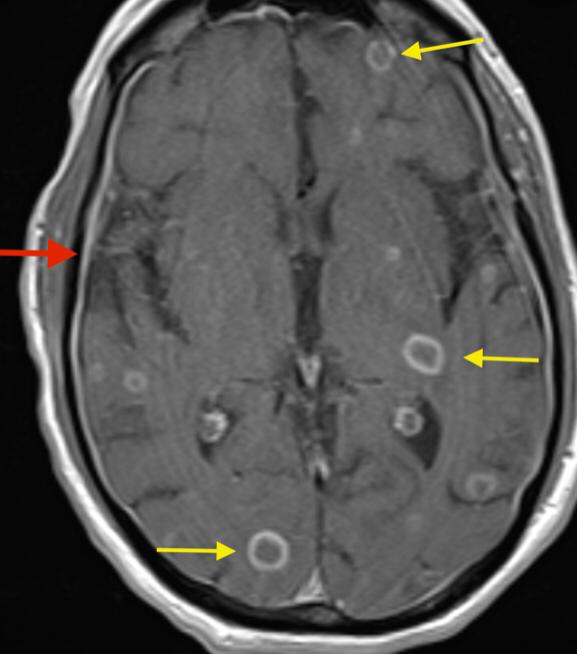 | - Right temporo-parietal and left parietal finger-like hypersignals on Flair and T12 Peri-lesionnal interstitial edema |  |
| TAP CT-Scan  (Extension, in search of a primitive site)  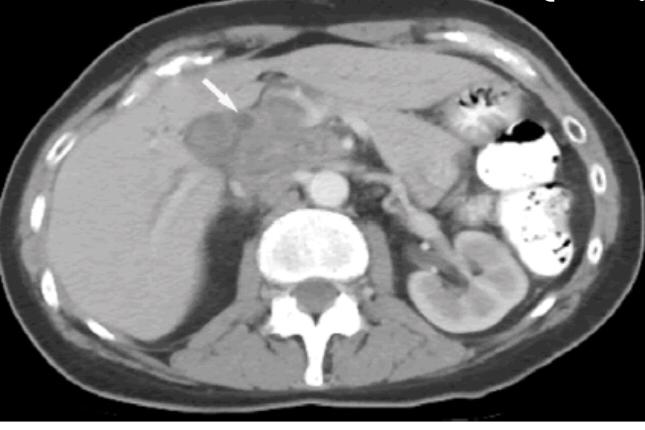 | - Coelio-mesenteric and para-aortic adenopathies | Bilateral interstitial pneumopathy with left apical cavern, associated with pulmonary nodules  (Acido-alcoholo-resistant bacteria in sputum)  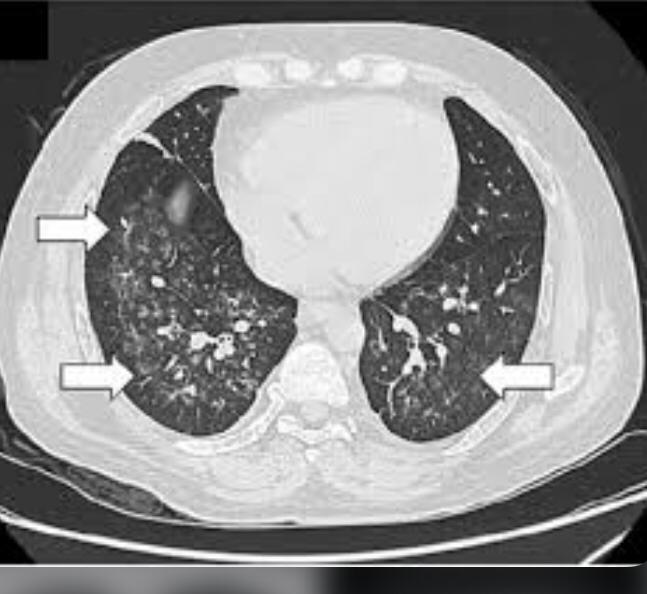 |
